# Supplementary material
Source: publisher figshare collection journal article supplement (https://tandf.figshare.com/ndownloader/files/13638407)
Supplement: Supplementary file 1 [file 13638407]

|  | Science performance index | Environmental  Science performance index | Citations in *Journal of Environmental Education* | Citations in *Environmental Education Research* | Country’s population (in millions) | Joint number of citations divided by the country’s population | GDP per capita.  World Bank (2000) |  |
| --- | --- | --- | --- | --- | --- | --- | --- | --- |
| Finland | 563 | 543 | 13 | 24 | 5,4 | 6,851852 | 23530 |  |
| Chinese Taipei* | 532 | 541 | 13 | 16 | 23,37 | 1,240907 |  |  |
| Hong Kong | 542 | 540 | 6 | 22 | 7,2 | 3,888889 | 25757 |  |
| Japan | 531 | 529 | 29 | 32 | 127,1 | 0,479937 | 37292 |  |
| Canada | 534 | 528 | 150 | 146 | 35,3 | 8,385269 | 23560 |  |
| Estonia | 531 | 528 | 3 | 0 | 1,3 | 2,307692 | 4133 |  |
| Slovenia | 519 | 523 | 2 | 13 | 2 | 7,5 | 11600 |  |
| Korea | 522 | 522 | 6 | 14 | 50 | 0,4 | 12094 |  |
| Australia | 527 | 519 | 89 | 235 | 23,4 | 13,84615 | 21678 |  |
| New Zealand | 530 | 516 | 29 | 52 | 4,5 | 18 | 13475 |  |
| Netherlands* | 525 | 514 | 29 | 66 | 16,8 | 5,654762 | 27111 |  |
| Germany | 522 | 513 | 27 | 78 | 80,7 | 1,301115 | 22946 |  |
| Czech Republic | 516 | 509 | 4 | 5 | 10,5 | 0,857143 | 5725 |  |
| Hungary | 513 | 509 | 2 | 3 | 9,9 | 0,505051 | 4543 |  |
| Switzerland | 504 | 508 | 10 | 29 | 8,1 | 4,814815 | 35639 |  |
| Belgium | 512 | 508 | 8 | 20 | 11,13 | 2,515723 | 22697 |  |
| Poland | 510 | 507 | 3 | 13 | 38,5 | 0,415584 | 4454 |  |
| Ireland | 498 | 506 | 8 | 25 | 4,6 | 7,173913 | 25579 |  |
| United Kingdom* | 508 | 504 | 75 | 81 | 63,7 | 2,44898 | 25362 |  |
| Austria | 515 | 502 | 8 | 22 | 8,5 | 3,529412 | 23794 |  |
| Demnark | 511 | 502 | 10 | 52 | 5,6 | 11,07143 | 29980 |  |
| France | 496 | 498 | 34 | 52 | 65,8 | 1,306991 | 21812 |  |
| Croatia | 495 | 498 | 1 | 0 | 4,3 | 0,232558 | 5192 |  |
| Sweden | 493 | 497 | 16 | 86 | 9,6 | 10,625 | 27869 |  |
| Latvia | 503 | 497 | 5 | 2 | 2 | 3,5 | 3301 |  |
| Lithuania | 490 | 497 | 0 | 2 | 2,9 | 0,689655 | 3267 |  |
| Spain | 488 | 495 | 20 | 44 | 46,6 | 1,373391 | 14414 |  |
| Slovak Republic | 488 | 494 | 0 | 2 | 5,4 | 0,37037 | 5330 |  |
| Russian Federation* or Russia | 488 | 493 | 13 | 13 | 143 | 0,181818 | 1775 |  |
| Unites States* or USA | 479 | 491 | 776 | 463 | 317,7 | 3,899906 | 36467 |  |
| Norway | 489 | 491 | 18 | 35 | 5,1 | 10,39216 | 37473 |  |
| Greece | 487 | 487 | 26 | 38 | 11 | 5,818182 | 11396 |  |
| Italy | 486 | 476 | 8 | 26 | 60 | 0,566667 | 19388 |  |
| Portugal | 473 | 475 | 7 | 14 | 10,5 | 2 | 15509 |  |
| Israel | 475 | 469 | 27 | 18 | 8,1 | 5,555556 | 19859 |  |
| Bulgaria | 474 | 461 | 3 | 3 | 7,28 | 0,824176 | 1579 |  |
| Chile | 454 | 458 | 7 | 8 | 16,3 | 0,920245 | 5133 |  |
| Serbia | 434 | 458 | 1 | 0 | 7,2 | 0,138889 | 809 |  |
| Uruguay | 438 | 456 | 1 | 1 | 3,3 | 0,606061 | 6873 |  |
| Jordan* | 436 | 455 | 2 | 0 | 6,6 | 0,30303 | 1763 |  |
| Romania | 428 | 446 | 1 | 2 | 20,1 | 0,149254 | 1651 |  |
| Turkey | 422 | 444 | 14 | 19 | 77 | 0,428571 | 4220 |  |
| Thailand | 412 | 444 | 10 | 10 | 65,9 | 0,30349 | 1969 |  |
| Mexico | 418 | 436 | 77 | 45 | 119,7 | 1,019215 | 6664 |  |
| Argentina | 424 | 435 | 7 | 6 | 40,1 | 0,32419 | 7701 |  |
| Colombia | 421 | 431 | 6 | 12 | 47,5 | 0,378947 | 2504 |  |
| Brazil | 410 | 430 | 32 | 42 | 201 | 0,368159 | 3694 |  |
| Indonesia | 391 | 428 | 9 | 15 | 250 | 0,096 | 790 |  |
| Tunisia | 388 | 428 | 0 | 2 | 10,9 | 0,183486 | 2245 |  |
| Azerbaijan | 390 | 411 | 0 | 0 | 9,4 | 0 | 655 |  |
| Qatar | 393 | 399 | 0 | 0 | 2 | 0 | 29914 |  |
| Kyrgyzstan | 386 | 396 | 0 | 0 | 5,7 | 0 | 280 |  |
| Cyprus |  |  | 7 | 7 | 1,1 | 12,72727 |  |  |
